# Supplementary material for: The Association of Race, Ethnicity, and Poverty With Child Maltreatment Reporting
Source: Oxford University Press journal article supplement (doi:10.1542/peds.2021-053346), 2022-07-18
Supplement: peds_2021053346supplementarydata.pdf [file peds_2021053346supplementarydata.pdf]

## Supplemental Information

**SUPPLEMENTAL TABLE 2** ICD-9 Diagnostic Codes for Maltreatment by Type

| ICD-9 Code                                                          | Code Description                                          |
|---------------------------------------------------------------------|-----------------------------------------------------------|
| <b>Sexual maltreatment</b>                                          |                                                           |
| Suggestive                                                          |                                                           |
| 054.1                                                               | Genital herpes                                            |
| 098                                                                 | Gonococcal infection                                      |
| 614.9                                                               | Pelvic inflammatory disease, unspecified                  |
| 922.4                                                               | Contusion of genital organs                               |
| Specific                                                            |                                                           |
| 995.53                                                              | Child sexual abuse                                        |
| V71.5                                                               | Observation after alleged rape                            |
| <b>Physical maltreatment</b>                                        |                                                           |
| Suggestive                                                          |                                                           |
| 362.81                                                              | Retinal hemorrhage                                        |
| 807.0                                                               | Rib fracture                                              |
| 807.1                                                               | Rib fracture                                              |
| 811                                                                 | Scapula fracture                                          |
| 852.2                                                               | Traumatic subdural hemorrhage                             |
| 853.0                                                               | Other/unspecified intracranial hemorrhage                 |
| 863.1                                                               | Stomach injury                                            |
| Specific                                                            |                                                           |
| 995.54                                                              | Child physical abuse                                      |
| 995.55                                                              | Shaken baby syndrome                                      |
| E965, E966                                                          | Assault                                                   |
| E967                                                                | Child abuse – injury purposely inflicted by other persons |
| E968.2                                                              | Assault                                                   |
| E968.9                                                              | Assault NOS                                               |
| E988                                                                | Undetermined intent, other means                          |
| <b>Undesignated maltreatment (neglect or physical maltreatment)</b> |                                                           |
| Suggestive                                                          |                                                           |
| 800                                                                 | Skull vault fracture                                      |
| 805                                                                 | Vertebral fracture                                        |
| 852.0                                                               | Traumatic subarachnoid hemorrhage                         |
| 862                                                                 | Intrathoracic injury                                      |
| 863.2                                                               | Small intestine injury                                    |
| 863.3                                                               | Small intestine injury                                    |
| 865                                                                 | Spleen injury                                             |
| 952                                                                 | Spinal cord injury                                        |
| Specific                                                            |                                                           |
| 995.5                                                               | Child abuse, unspecified                                  |
| 995.59                                                              | Other child abuse and neglect                             |
| V71.81                                                              | Evaluation for abuse and neglect                          |
| <b>Neglect</b>                                                      |                                                           |
| Suggestive                                                          |                                                           |
| 262                                                                 | Other severe malnutrition                                 |
| 521.0                                                               | Dental caries                                             |
| 692.7                                                               | Solar radiation dermatitis                                |
| 808                                                                 | Pelvic fracture                                           |
| 860                                                                 | Traumatic pneumohemothorax                                |
| 861                                                                 | Heart or lung injury                                      |
| 863.8                                                               | GI injury                                                 |
| 864                                                                 | Liver injury                                              |
| 866                                                                 | Kidney injury                                             |
| 941                                                                 | Burn of head                                              |
| 942                                                                 | Burn of trunk                                             |
| 945                                                                 | Burn of leg                                               |
| 946                                                                 | Burn of multiple sites                                    |
| 960-969                                                             | Poisoning by drugs/medicinals                             |

**SUPPLEMENTAL TABLE 2** Continued

| ICD-9 Code | Code Description                    |
|------------|-------------------------------------|
| 970-979    | Poisoning by drugs/medicinals       |
| 994.1      | Drowning, nonfatal submersion       |
| E869.4     | Second-hand tobacco smoke           |
| E910.2     | Swimming accident                   |
| E910.4     | Bathtub (near) drowning             |
| E910.8     | Other (near) drowning               |
| E910.9     | Accidental (near) drowning, NOS     |
| E960.0     | Unarmed fight, brawl                |
| E980       | Undetermined intent, poisoning      |
| E985       | Undetermined intent, firearm        |
| V60        | Household circumstances             |
| Specific   |                                     |
| 995.51     | Child emotional/psychological abuse |
| 995.52     | Child neglect (nutritional)         |

GI, gastrointestinal; ICD-9, *International Classification of Disease, Ninth Revision*; NOS, not otherwise specified.
